# Supplementary material for: DeerLab: a comprehensive software package for analyzing dipolar electron paramagnetic resonance spectroscopy data
Source: Copernicus journal article supplement (doi:10.5194/mr-1-209-2020), 2020-10-01
Supplement: Supplementary file 1 [file mr-1-209-2020-supplement.zip]

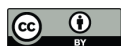

## *Supplement of*

# **DeerLab: a comprehensive software package for analyzing dipolar electron paramagnetic resonance spectroscopy data**

**Luis FÁ**

*Correspondence to:* Stefan Stoll (stst@uw.edu)

- mr-1-209-2020-supplement-title-page.pdf
- DeerLab\_SI-mr-2020-13.pdf
- scripts
  - data
    - \* figure10\_Pdata.txt
    - \* figure10\_Vdata.txt
    - \* figure1a\_Pdata.txt
    - \* figure1a\_Vdata.txt
    - \* figure1b\_Pdata.txt
    - \* figure1b\_Vdata.txt
    - \* figure2\_Pdata.txt
    - \* figure2\_Vdata.txt
    - \* figure4\_Pdata.txt
    - \* figure4\_Vdata.txt
    - \* figure6a\_Pdata.txt
    - \* figure6a\_Vdata.txt
    - \* figure6b\_Pdata.txt
    - \* figure6b\_Vdata.txt
    - \* figure7\_Pdata.txt
    - \* figure7\_Vdata.txt
    - \* figure8\_Pdata.txt
    - \* figure8\_Vdata.txt
  - figure1\_regularization.m
  - figure1\_regularization.py
  - figure2\_multigauss.m
  - figure2\_multigauss.py

- figure4\_onestepanalysis.m
- figure4\_onestepanalysis.py
- figure6\_multipathway.m
- figure6\_multipathway.py
- figure7\_globalfit.m
- figure7\_globalfit.py
- figure8\_modelfree\_titration.m
- figure8\_modelfree\_titration.py
- figure\_10\_uncertaintyestimation.m
- figure\_10\_uncertaintyestimation.py
- groundtruth.m

The copyright of individual parts of the supplement might differ from the CC BY 4.0 License.
